# Supplementary material
Source: publisher figshare collection journal article supplement (https://diabetesjournals.figshare.com/articles/dataset/_/19592836)
Supplement: Supplementary file 1 [file 1]

## Checklist for Reporting Human Islet Preparations Used in Research

Adapted from Hart NJ, Powers AC (2018) Progress, challenges, and suggestions for using human islets to understand islet biology and human diabetes. Diabetologia <https://doi.org/10.1007/s00125-018-4772-2>.

|                                                                                                                                                                                                                                                                                                                                                                                                                                                                                                                                                                                                     |                                                                                                                    |
|-----------------------------------------------------------------------------------------------------------------------------------------------------------------------------------------------------------------------------------------------------------------------------------------------------------------------------------------------------------------------------------------------------------------------------------------------------------------------------------------------------------------------------------------------------------------------------------------------------|--------------------------------------------------------------------------------------------------------------------|
| <b>Manuscript DOI: [ DB21-0926]</b>                                                                                                                                                                                                                                                                                                                                                                                                                                                                                                                                                                 |                                                                                                                    |
| <b>Title: Indirect and direct effects of SARS-CoV-2 on human pancreatic islets</b>                                                                                                                                                                                                                                                                                                                                                                                                                                                                                                                  |                                                                                                                    |
| <b>Author list:</b> Moufida Ben Nasr, Francesca D’Addio, Laura Montefusco, Vera Usuelli, Cristian Loretelli, Antonio Rossi, Ida Pastore, Ahmed Abdelsalam, Anna Maestroni, Marco Dell’Acqua, Elio Ippolito, Emma Assi, Andy Joe Seelam, Roberta Maria Fiorina, Enrica Chebat, Paola Morpurgo, Maria Elena Lunati, Andrea Mario Bolla, Reza Abdi, Joseph V. Bonventre, Stefano Rusconi, Agostino Riva, Domenico Corradi, Pierachille Santus, Pamela Clark, Manuela Nebuloni, Gabriella Baldi, Giovanna Finzi, Franco Folli, Gian Vincenzo Zuccotti, Massimo Galli, Kevan C. Herold and Paolo Fiorina |                                                                                                                    |
| <b>Corresponding author: Paolo Fiorina</b>                                                                                                                                                                                                                                                                                                                                                                                                                                                                                                                                                          | <b>Email address: <a href="mailto:paolo.fiorina@childrens.harvard.edu">paolo.fiorina@childrens.harvard.edu</a></b> |

| Islet preparation     | 1     | 2     | 3     | 4     | 5 | 6 | 7 | 8 <sup>a</sup> |
|-----------------------|-------|-------|-------|-------|---|---|---|----------------|
| MANDATORY INFORMATION |       |       |       |       |   |   |   |                |
| Unique identifier     | CTRL1 | CTRL2 | CTRL3 | CTRL4 |   |   |   |                |
| Donor age (years)     | 56    | 52    | 38    | 49    |   |   |   |                |
| Donor sex (M/F)       | M     | M     | F     | M     |   |   |   |                |

|                                                                             |    |      |    |    |  |  |  |  |
|-----------------------------------------------------------------------------|----|------|----|----|--|--|--|--|
| Donor BMI (kg/m <sup>2</sup> )                                              | 26 | 24.7 | 24 | 28 |  |  |  |  |
| Donor HbA <sub>1c</sub> or other measure of blood glucose control           |    |      |    |    |  |  |  |  |
| Origin/source of islets <sup>b</sup>                                        |    |      |    |    |  |  |  |  |
| Islet isolation centre                                                      |    |      |    |    |  |  |  |  |
| Donor history of diabetes? Yes/No                                           | No | No   | No | No |  |  |  |  |
| <b>If Yes, complete the next two lines if this information is available</b> |    |      |    |    |  |  |  |  |
| Diabetes duration (years)                                                   |    |      |    |    |  |  |  |  |
| Glucose-lowering therapy at time of death <sup>c</sup>                      |    |      |    |    |  |  |  |  |

| RECOMMENDED INFORMATION |  |  |  |  |  |  |  |  |
|-------------------------|--|--|--|--|--|--|--|--|
| Donor cause of death    |  |  |  |  |  |  |  |  |
| Warm ischaemia time (h) |  |  |  |  |  |  |  |  |

|                                                                                   |  |  |  |  |  |  |  |  |
|-----------------------------------------------------------------------------------|--|--|--|--|--|--|--|--|
| Cold ischaemia time (h)                                                           |  |  |  |  |  |  |  |  |
| Estimated purity (%)                                                              |  |  |  |  |  |  |  |  |
| Estimated viability (%)                                                           |  |  |  |  |  |  |  |  |
| Total culture time (h) <sup>d</sup>                                               |  |  |  |  |  |  |  |  |
| Glucose-stimulated insulin secretion or other functional measurement <sup>e</sup> |  |  |  |  |  |  |  |  |
| Handpicked to purity?<br>Yes/No                                                   |  |  |  |  |  |  |  |  |
| Additional notes                                                                  |  |  |  |  |  |  |  |  |

<sup>a</sup>If you have used more than eight islet preparations, please complete additional forms as necessary

<sup>b</sup>For example, IIDP, ECIT, Alberta IsletCore

<sup>c</sup>Please specify the therapy/therapies

<sup>d</sup>Time of islet culture at the isolation centre, during shipment and at the receiving laboratory

<sup>e</sup>Please specify the test and the results
